# Social network heterogeneity is essential for contact tracing

Bjarke Frost Nielsen<sup>a,1</sup>, Kim Sneppen<sup>a</sup>, Lone Simonsen<sup>b</sup>, and Joachim Mathiesen<sup>a</sup>

<sup>a</sup>Niels Bohr Institute, University of Copenhagen, 2100 Copenhagen, Denmark; <sup>b</sup>Department of Science and Environment, Roskilde University, 4000 Roskilde, Denmark

This manuscript was compiled on July 14, 2020

**Contact tracing is suggested as an effective strategy for controlling an epidemic without severely limiting personal mobility. Here, we explore how social structure affects contact tracing of COVID-19. Using smartphone proximity data, we simulate the spread of COVID-19 and find that heterogeneity in the social network and activity levels of individuals decreases the severity of an epidemic and improves the effectiveness of contact tracing. As a mitigation strategy, contact tracing depends strongly on social structure and can be remarkably effective, even if only frequent contacts are traced. In perspective, this highlights the necessity of incorporating social heterogeneity into models of mitigation strategies.**

COVID-19 | Epidemiological modeling | Social structure | Contact tracing

Epidemics are typically modeled by well-mixed compartmental models (1–4) where some degree of social heterogeneity can be introduced by sub-dividing the model population according to e.g. age, occupation, household and social spheres (5–10). Despite the possibility of adjusting interaction rates between sub-populations, well-mixed models may fail to predict the evolution of an epidemic when social interactions are spatio-temporally restricted (10), like in real *contact networks*. The social interactions of individuals tend to follow a characteristic pattern; you meet the same people at specific times during a week, form groups based on social preferences and, in addition, the number of weekly contacts varies significantly from person to person – phenomena which contribute to transmission heterogeneity. In a well-mixed model – even if stratified by e.g. age – your contacts are essentially drawn at random at each new instant, neglecting the monotony seen in real networks. In previous epidemics, perhaps most notably the Ebola epidemic of 2014–16, transmission heterogeneity and mobility patterns have been shown to be decisive factors (11). Lately, contact tracing – a mitigation strategy which relies directly on the contact network structure – has been the center of much attention due to its promises of epidemic control in a relatively open society (12–17). In order to assess contact tracing strategies, detailed information on contact networks is indispensable, and the usual well-mixed approach is inadequate – even more so than when modelling unmitigated spreading (18, 19).

In this paper, we utilize Bluetooth proximity data obtained from a cohort of university students at a large European university (see *Methods* for details). These data are similar in nature to the sort of readings one might obtain from contact tracing smartphone applications (20), meaning that they provide a useful virtual laboratory for contact tracing. Whereas our data only comprise a section of the total contact network of each participant, they display well-defined and robust heterogeneity, the effects of which can be studied, and compared with analogous homogenized networks.

The participant group is homogeneous in age and occupation, and would consequently be treated as undifferentiated in typical epidemiological models – an assumption that we can directly probe the validity of, in the context of contact tracing. Specifically, we will consider the effects of **contact heterogeneity** on the spread of COVID-19. For that purpose, we introduce three degrees of heterogeneity: **i)** an unaltered real network. **ii)** an edge-swapped version of the network (21), retaining contact heterogeneity but eliminating group formation preferences, including spatial preferences. **iii)** a randomized network, retaining only the overall (mean) contact frequency, but eliminating heterogeneity. This allows us to investigate questions such as whether it affects the spread of COVID-19 if some people are more social than others or if the the social network has distinct sub-communities. Furthermore, we suggest a realistic and easy-to-implement **contact tracing** scheme. We quantify the influence of contact heterogeneity *on* contact tracing in terms of two key parameters, the frequency by which symptomatic individuals are tested and the duration of social contacts with exposed individuals that would trigger a self-quarantine. The latter is especially interesting, since it is a directly controllable parameter when e.g. designing contact tracing smartphone applications (20).

## Materials and Methods

We analyze social proximity and contact dynamics from data collected by smartphones distributed among around 1000 participants (undergraduate students at the Technical University of Denmark (22, 23)). The smartphones were equipped with an application that collected communication in the form of call and text messaging logs, geolocation (GPS coordinates) and social proximity using the Bluetooth port. All smartphones in the study were programmed

### Significance Statement

The COVID-19 epidemic has put severe limitations on individual mobility in the form of lockdowns and closed national borders. Mitigation strategies permitting individual mobility while limiting disease spreading are needed, and contact tracing is a potentially effective example of such a strategy. We use smartphone proximity data to monitor contacts between people, and find that contact tracing is highly dependent on social structure, being very effective on real contact networks. This shows that mitigation of COVID-19 may be possible with contact tracing, and that epidemiological models must incorporate social network structure.

Please provide details of author contributions here.

Please declare any competing interests here.

<sup>1</sup>To whom correspondence should be addressed. E-mail: [bjarkefrostnielsen@nbi.ku.dk](mailto:bjarkefrostnielsen@nbi.ku.dk). Address: Niels Bohr Institute, Blegdamsvej 17, 2100 Copenhagen, Denmark.

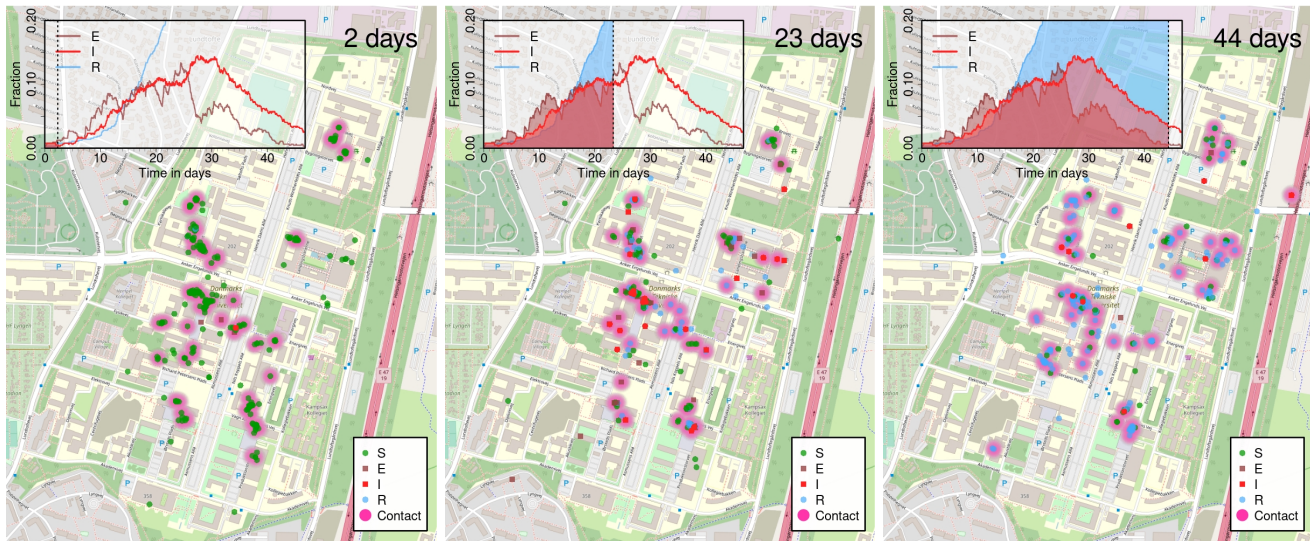

**Fig. 1.** Simulating the spread of COVID-19 on the contact network. Here, a zoom on the geographical positions of individuals (based on GPS coordinates) during a typical work day and for a representative run of the epidemic model. Regions of contact (defined by signal strength exceeding the  $-85\text{dBm}$  cutoff) are shown as diffuse clouds of pink. Snapshots shown are at day 2, 23 and 44 of the outbreak.

69 to open their Bluetooth ports every 5 minutes to scan for nearby  
 70 devices included in the study and to record the GPS coordinates.  
 71 The data we consider have been collected over a period of two years,  
 72 2013-2015.

73 The distance between participants is inferred from the strength  
 74 (RSSI) of the Bluetooth signal being sent between the devices. The  
 75 signal strength can resolve distances in the range of  $\leq 1$  meter to  
 76 approximately 10-15 meters (24). We define a *contact* between  
 77 two individuals whenever the Bluetooth signal strength between  
 78 their respective devices exceeds  $-85\text{dBm}$ . This definition of contact  
 79 captures essentially all  $\leq 1\text{m}$  interactions while excluding a large  
 80 portion of the 3m interactions and above (24), in line with the  
 81 recommendations of public health authorities (25, 26). This allows  
 82 us to create a well-defined time-dependent contact network where  
 83 individuals are represented by nodes and social contact by time-  
 84 dependent links, similarly to the work of (27). The link activity, or  
 85 the contact between nodes, is resolved in temporal windows of 5  
 86 minutes. This time-dependent contact network will be the basis for  
 87 our modeling of the transmission of COVID-19.

88 We model the spread of COVID-19 by an agent-based model  
 89 (where the study participants serve as the agents) with five  
 90 states: **S**usceptible to the disease, **E**xposed, **P**re-symptomatic  
 91 (but infectious), **I**nfected (potentially with symptoms) and  
 92 **R**ecovered/Removed. In the absence of contact tracing (described  
 93 below), the P and I states are identical, in that an individual in  
 94 one of these states can infect others. Aside from these mutually  
 95 exclusive states, persons can also be flagged as **Q**uarantined. When  
 96 a susceptible person comes into contact with a person in the I or  
 97 P state, there is a probability  $p_{\text{inf}}$  of transmission of the disease in  
 98 each 5-minute window. The basic model (without contact tracing)  
 99 thus has four parameters: Transmission probability upon contact  
 100  $p_{\text{inf}}$ , a time-scale characterizing the exposed state  $\tau_E$ , a time-scale  
 101 characterizing the pre-symptomatic state  $\tau_P$  and a time-scale char-  
 102 acterizing the infected state  $\tau_I$ .

103 As shown in the model illustration of Fig. 2, the incubation time  
 104 is assumed to be gamma-distributed with a mean of 3.6 days, of  
 105 which 1.2 days comprise the pre-symptomatic infectious state. The  
 106 infectious state, where symptoms may be displayed, is set to be 5  
 107 days. The last parameter in the model, the transmission probability  
 108 in each window of time, is fitted to reproduce a daily growth rate  
 109 of 23% in the early epidemic, based on estimates from (28).

110 By employing two different ways of *shuffling* the network con-  
 111 nections (edges), we study the effects of contact heterogeneity on  
 112 the one hand, and spatial constraints and group formation on the  
 113 other. The first method, *edge swapping*, preserves the degree of  
 114 connectivity of each person (node), while destroying any spatial and

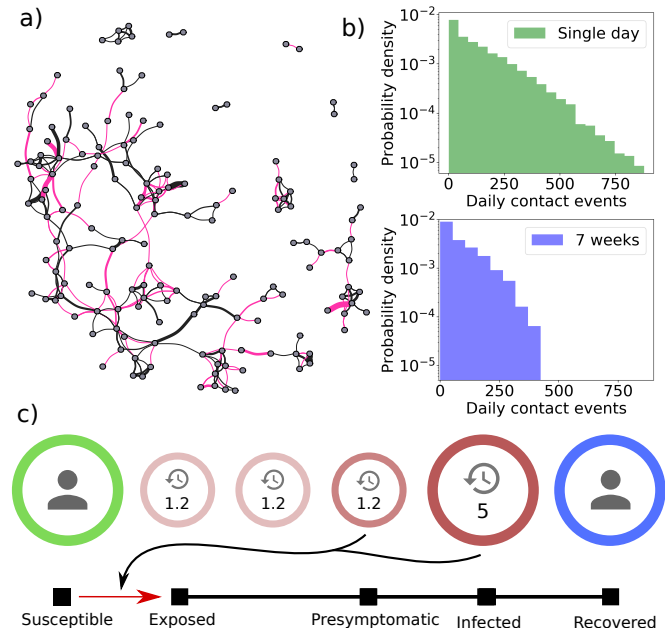

**Fig. 2. a)** A small subset of a contact network for one week. Link thickness indicates the cumulative contact time, with links with less than 2 hours cumulative activity being omitted. Black lines represent the links recurring from the previous week, whereas the red lines are new links. **b) Top:** Histogram of contact events over a single day (semi-logarithmic plot). The coefficient of variation is  $c_V = 1.03$  and the mean is  $\mu = 131$ . **Bottom:** Histogram of contact events over a seven week period, divided by the number of days to obtain an average daily rate (semi-logarithmic plot). Here,  $c_V = 0.95$  and  $\mu = 86$ . Both plots show a marked heterogeneity, demonstrating that contact heterogeneity is approximately a quenched disorder on the timescale of a few weeks. **c)** Our agent-based model of COVID-19 spreading on a contact network. Individuals in the Susceptible state may be exposed by those in the Presymptomatic as well as Infected states. The Exposed-Presymptomatic triplet of states together comprise the gamma-distributed incubation period.

115 group formation preference (21). The second method, *randomiza-*  
 116 *tion*, preserves only the overall connectivity level in each window of  
 117 time, but homogenizes the number of contacts for each person. In  
 118 Fig. 3, we plot an epidemic trajectory averaged over 20 simulations.

119 **Contact tracing.** The entire scheme around contact tracing con-  
 120 sists of two parts: *regular testing* of symptomatic individuals (with  
 121 a testing probability  $p_{\text{test}} < 1$ ) and the contact tracing algorithm  
 122 itself, which is activated once an individual tests positive. Once a  
 123 positive individual is found by *regular testing*, their recent contacts  
 124 are put in quarantine for a specified time (5 days as suggested by  
 125 (17)) and tested once the quarantine period has elapsed (before po-  
 126 tential release). In other words, the contact tracing scheme proceeds  
 127 as follows:

- 128 • For each individual, a list of contact events is kept. When a  
 129 person is tested positive, all contacts older than 5 days (the  
 130 *retention time*) are discarded, the person is quarantined for 5  
 131 days, and all individuals on the contact list are traced.
- 132 • If a traced individual has been in contact with the positive  
 133 person for longer than a certain *contact threshold*, the traced  
 134 individual is also quarantined for 5 days.
- 135 • After the quarantine period has elapsed, the individual is tested.  
 136 If negative, the individual is released. Otherwise a new 5-day  
 137 quarantine is issued.

138 The quarantine is assumed to be instantaneous and a quarantined  
 139 person has no contact with others. The two simplest assumptions  
 140 regarding the *regular testing* scheme are that symptomatic individ-  
 141 uals are tested at a constant *rate* (throughout their illness), or that  
 142 they have a *fixed probability* of being tested when first developing  
 143 symptoms. We have compared the two approaches and found that  
 144 they perform comparably (see Supporting Information), and thus  
 145 we work with the fixed probability scheme here, for simplicity.

## 146 Results

147 **Heterogeneous activity levels.** The distribution of the  
 148 number of daily contact events for all individuals in our study  
 149 is shown in Fig. 2. The distribution reflects a marked het-  
 150 erogeneity in activity levels, characterized by an exponential  
 151 shape (see Fig. 2b) with a coefficient of variation of 1.03 and  
 152 a mean of 131. Even more importantly, a significant degree of  
 153 contact heterogeneity is retained, albeit with some attenuation,  
 154 when exploring an entire 7-week window. Here the coefficient  
 155 of variation is 0.95, still close to the value for an exponential  
 156 distribution, and the mean is 86. It is clear that extreme social  
 157 behaviour becomes less frequent over this longer time-window,  
 158 reflecting that individuals do not come into university every  
 159 single day, with the mean value of 86 corresponding to  
 160 being inactive on 34% of workdays. However, the significant  
 161 degree of contact heterogeneity still present shows that  
 162 it approximately represents a *quenched disorder*, which  
 163 affects the entire epidemic trajectory and does not simply  
 164 average out over the course of an epidemic. In the following  
 165 we explore the profound consequences of contact heterogeneity.  
 166

167 **Heterogeneity reduces epidemic severity.** In Fig. 3, we  
 168 show the simulated evolution of COVID-19 on three different  
 169 contact networks: The true network (unshuffled), the edge-  
 170 swapped and the fully randomized network where each person  
 171 is assigned an average contact frequency. Each trajectory is  
 172 averaged over 20 runs, each similar in nature to the one shown  
 173 in the inserts of Fig. 1.

174 The overall findings are that:

- 175 • The total number of exposed individuals is very sensitive  
 176 to heterogeneity in activity levels, but *not* to network

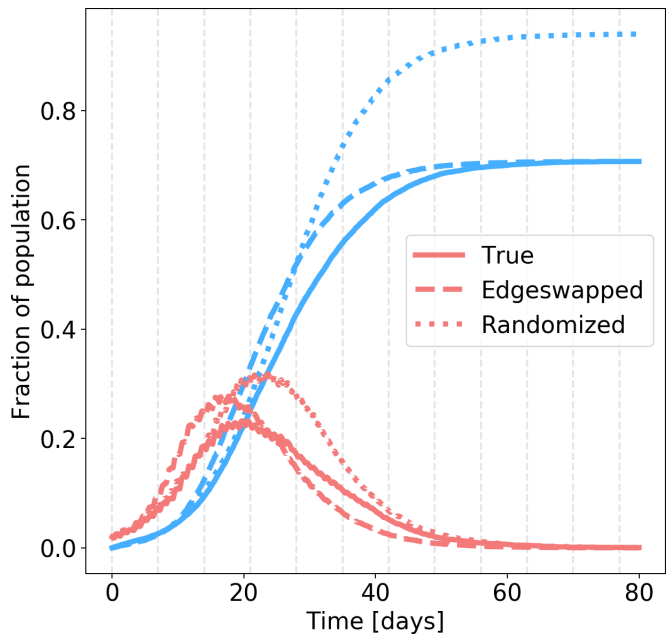

177 **Fig. 3.** Comparison of exposed + presymptomatic + infected (red) and recovered (blue) individuals in the three networks types. Each curve represents an ensemble average over 20 simulations. *True network* (full lines): Total fraction exposed: 71%. Infection peak: 28%. *Edgeswapped network* (dashed lines): Total fraction exposed: 71%. Infection peak: 33%. *c) Randomized network* (dotted lines): Total fraction exposed: 94%. Infection peak: 37%. The infection probability per 5-minute contact is  $p_{\text{inf}} = 0.5\%$ , fitted to produce a daily growth rate of 23% in the early epidemic, for the true network.

177 structure. Heterogeneous activity evidently *prevent* the  
 178 disease from spreading to all parts of the network, with the  
 179 total fraction exposed reaching 71% in the true network  
 180 and 94% in the randomized network.

- 181 • The infection peak, on the other hand, is sensitive to  
 182 spatial effects *as well as* contact heterogeneity. As such,  
 183 the peak load increases by some 5 percentage points when  
 184 spatial structure is destroyed, and by 9 percentage points  
 185 when contact structure is homogenized as well.
- 186 • Overall, the group formation and spatial structure only  
 187 has the effect of slowing the progression somewhat, but  
 188 does not affect the attack rate.

189 **Repeated contacts are essential for contact tracing.** The  
 190 effects of contact heterogeneity and social preference on contact  
 191 tracing can be probed by utilizing the same two modes of  
 192 network re-shuffling as in the previous section. In Fig. 4  
 193 we compare how the contact tracing algorithm performs on  
 194 the three networks. It is clear that the epidemic trajectory  
 195 of the *true* network is drastically altered by contact tracing,  
 196 with the attack rate and infection peak being profoundly  
 197 attenuated. In the two shuffled networks, on the other hand,  
 198 we see very little benefit from contact tracing. This leads to  
 199 the conclusion, that contact tracing depends strongly on social  
 200 network structure. Both edge-swapping and randomization  
 201 reduce contact monotonicity. To quantify this, we find that the  
 202 median fraction of contacts (of at least 60 minutes cumulative  
 203 duration) which are repeated from one week to the next is 30%  
 204 in the real network, while edge-swapping reduces this number

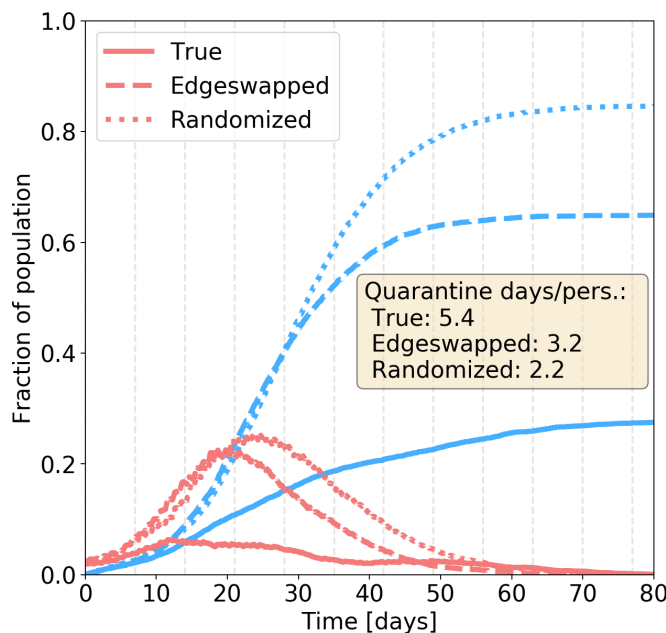

**Fig. 4. Contact tracing.** Comparison of exposed + presymptomatic + infected (red) and recovered (blue) individuals in the three networks types. Disease parameters are identical to those of Fig. 3. The contact threshold for quarantining is approximately 2 hours (125 minutes) while the testing probability is set at 25%.

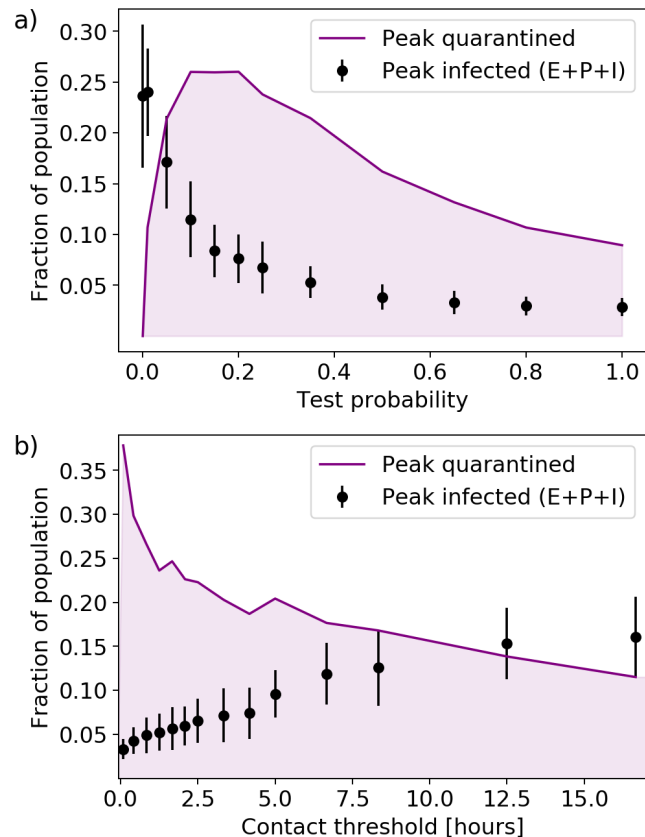

**Fig. 5. Contact tracing effectiveness.** Disease parameters are identical to those of Fig. 3. a) Testing probability vs peak infection and quarantine fraction. The contact threshold is set at 125 minutes. b) Contact threshold vs peak infection and quarantine fraction. The testing probability is set at 25%. For each value of the parameter, 50 simulations were run. The error bars indicate the standard deviation of outcomes of individual simulations.

205 to zero. Evidently, this *repetition* of contacts is necessary for  
206 contact tracing.

207 **Estimating an optimal contact threshold for efficient trac-**  
208 **ing.** When making public health decisions about COVID-19  
209 mitigation schemes, it is first and foremost important to have  
210 reliable predictions regarding the effectivity of the schemes.  
211 Next, however, it is advantageous to identify the parameters  
212 which influence the effectiveness. Some of these parameters are  
213 beyond our control – for example properties which are intrinsic  
214 to SARS-CoV-2 – while others can be partially controlled, or  
215 even constitute design decisions on our part.

216 In the two following sections, we explore two central par-  
217 ameters, namely the *testing probability* and *contact threshold*.  
218 The former determines the probability of being tested if sick,  
219 while the latter determines how readily quarantines are issued  
220 when contact with an infectious person has been established.

221 **The testing probability.** The regular testing required in contact  
222 tracing is determined by a *testing probability* which reflects  
223 several factors not individually modeled here, such as general  
224 testing availability, symptom development and willingness to  
225 participate in testing. In Fig. 5a, we explore the influence of  
226 the testing probability on the peak load in terms of quarantined  
227 and exposed individuals.

228 Unsurprisingly, the quarantine fraction vanishes at very  
229 low testing probabilities, where the infection peak attains  
230 its maximal value. While the infection load is a decreasing  
231 function of testing, the quarantine fraction does not display a  
232 simple monotonic response to an increase in testing. Rather, it  
233 attains a maximum around 10%, followed by a gradual decline.  
234 This clearly shows that changes in testing availability should  
235 go hand-in-hand with considerations of the influence on the  
236 quarantine fraction, and that the relation is nontrivial.

237 **The contact threshold.** When performing contact tracing, it is  
238 necessary to define a *contact threshold*, meaning the minimum  
239 duration of proximity between an infectious and a susceptible  
240 person which results in quarantine. Setting a low contact  
241 threshold will thus intuitively lead to a large fraction of contact  
242 persons being placed in quarantine, when a positive individual  
243 is found. In Fig. 5b, the contact threshold is shown to have  
244 a profound effect on the infection peak as well as the peak  
245 fraction of the population in quarantine. As intuition would  
246 have it, the infection peak is clearly an increasing function of  
247 the contact threshold, while the quarantine fraction decreases.

248 Above a contact threshold of approximately two hours of  
249 cumulative proximity, the quarantine fraction decreases only  
250 slowly. The peak infection load, on the other hand, increases  
251 steadily with the threshold, with a reduction of the epidemic  
252 peak down from 25% in the absence contact tracing to 8%  
253 when requiring at least 4 hours of cumulative contact within  
254 a 5 day window before quarantining. This goes to show that  
255 contact tracing is effective, *even if* it is only possible to locate  
256 frequent contacts (and 25% of the infected people).

## 257 Discussion

258 This paper explores the effect of contact heterogeneity on the  
259 dynamics and mitigation of an epidemic. In general, we observe  
260 that the social activity level of individuals is well approximated  
261 by an exponential distribution (see Fig. 2). This observation  
262 is consistent with the findings of (5), where a coefficient of  
263 variation of social contacts of about 0.8 was reported for  
264 people between 20 and 30 years. Further, person-specific social  
265 activity remains constant over longer time intervals where both  
266 the 1 day and the 7 week activity patterns have coefficients  
267 of variations close to 1. Thus the social activity represents  
268 a quenched disorder that significantly impedes the spread of  
269 the disease and makes the mitigation by contact tracing more  
270 efficient. In comparison with our results, traditional well-mixed  
271 S(E)IR models overestimate the severity of the epidemic, or,  
272 conversely, lead to an underestimation of transmission risk  
273 when fitted to an epidemic trajectory. In a previous modelling  
274 study (29), it was shown that heterogeneity in the *susceptibility*  
275 of individuals likewise reduces the overall severity.

276 Recently, several studies have found significant heterogene-  
277 ity in COVID-19 transmission (30, 31). Relatedly, it was shown  
278 in an agent-based model that heterogeneity in *infectiousness*  
279 has a considerable impact on the feasibility of COVID-19  
280 mitigation strategies (32). Our main finding is that another  
281 type of heterogeneity, namely the social kind, has a similarly  
282 profound effect on the effectiveness of contact tracing (Fig. 4):  
283 Structured social networks make mitigation by tracing much  
284 more cost-effective. Correspondingly, models which neglect  
285 social clustering are likely to underestimate the feasibility of  
286 contact tracing schemes.

287 We explore the effects of two central parameters, the *testing*  
288 *probability* and the *contact threshold* on the contact tracing  
289 scheme. The testing probability is influenced both by factors  
290 which are within our control, such as the overall availability of  
291 testing, and by factors which are essentially intrinsic to SARS-  
292 CoV-2, such as the rate at which symptoms develop. We find a  
293 non-trivial relation between testing probability and quarantine  
294 fraction, with a peak in quarantined individuals occurring at  
295 around 10% testing probability. The contact threshold, on  
296 the other hand, is a controllable parameter and essentially

constitutes a design decision when e.g. developing contact  
tracing applications (20). We conclude that contact tracing  
remains effective, even if only relatively frequent contacts are  
quarantined.

1. WO Kermack, AG McKendrick, GT Walker, A contribution to the mathematical theory of epidemics. *Proc. Royal Soc. London. Ser. A, Containing Pap. a Math. Phys. Character* **115**, 700–721 (1927).
2. Norwegian Institute of Public Health, Coronavirus modelling at the NIPH (<https://www.fhi.no/en/id/infectious-diseases/coronavirus/coronavirus-modelling-at-the-niph-fhi/>) (2020) [Online; accessed 28-May-2020].
3. L Peng, W Yang, D Zhang, C Zhuge, L Hong, Epidemic analysis of covid-19 in china by dynamical modeling (2020).
4. N Ferguson, et al., Report 9: Impact of non-pharmaceutical interventions (npis) to reduce covid19 mortality and healthcare demand. *Imp. Coll. COVID-19 Response Team* (2020).
5. J Mossong, et al., Social contacts and mixing patterns relevant to the spread of infectious diseases. *PLoS medicine* **5** (2008).
6. P Klepac, S Kissler, J Gog, Contagion! the bbc four pandemic—the model behind the documentary. *Epidemics* **24**, 49–59 (2018).
7. P Klepac, et al., Contacts in context: large-scale setting-specific social mixing matrices from the bbc pandemic project. *medRxiv* (2020).
8. L Pellis, S Cauchemez, NM Ferguson, C Fraser, Systematic selection between age and household structure for models aimed at emerging epidemic predictions. *Nat. communications* **11**, 1–11 (2020).
9. K Prem, et al., The effect of control strategies to reduce social mixing on outcomes of the COVID-19 epidemic in Wuhan, China: a modelling study. *The Lancet Public Heal.* (2020).
10. MJ Keeling, et al., Predictions of covid-19 dynamics in the uk: short-term forecasting and analysis of potential exit strategies. *medRxiv* (2020).
11. MS Lau, et al., Spatial and temporal dynamics of superspreading events in the 2014–2015 west africa ebola epidemic. *Proc. Natl. Acad. Sci.* **114**, 2337–2342 (2017).
12. MJ Keeling, TD Hollingsworth, JM Read, The efficacy of contact tracing for the containment of the 2019 novel coronavirus (covid-19). *medRxiv* (2020).
13. RM Anderson, H Heesterbeek, D Klinkenberg, TD Hollingsworth, How will country-based mitigation measures influence the course of the covid-19 epidemic? *The Lancet* **395**, 931–934 (2020).
14. J Hellewell, et al., Feasibility of controlling covid-19 outbreaks by isolation of cases and contacts. *The Lancet Glob. Heal.* (2020).
15. AJ Kucharski, et al., Effectiveness of isolation, testing, contact tracing and physical distancing on reducing transmission of sars-cov-2 in different settings. *medRxiv* (2020).
16. L Ferretti, et al., Quantifying sars-cov-2 transmission suggests epidemic control with digital contact tracing. *medRxiv* (2020).
17. A Eilertsen, K Sneppen, Estimating cost-benefit of quarantine length for covid-19 mitigation. *medRxiv* (2020).
18. M Gasparek, M Racko, M Dubovsky, A stochastic, individual-based model for the evaluation of the impact of non-pharmacological interventions on covid-19 transmission in slovakia. *medRxiv* (2020).
19. A Aleta, et al., Modeling the impact of social distancing, testing, contact tracing and household quarantine on second-wave scenarios of the covid-19 epidemic. *medRxiv* (2020).
20. Apple Inc., Building an App to Notify Users of COVID-19 Exposure ([https://developer.apple.com/documentation/exposurenotification/building\\_an\\_app\\_to\\_notify\\_users\\_of\\_covid-19\\_exposure](https://developer.apple.com/documentation/exposurenotification/building_an_app_to_notify_users_of_covid-19_exposure)) (2020) [Online; accessed 31-May-2020].
21. S Maslov, K Sneppen, Specificity and stability in topology of protein networks. *Science* **296**, 910–913 (2002).
22. A Stopczynski, et al., Measuring large-scale social networks with high resolution. *PLoS one* **9**, e95978 (2014).
23. A Mollgaard, et al., Measure of node similarity in multilayer networks. *PLoS one* **11** (2016).
24. V Sekara, S Lehmann, The strength of friendship ties in proximity sensor data. *PLOS ONE* **9**, 1–8 (2014).
25. World Health Organization, Q&A on coronaviruses (COVID-19) (<https://www.who.int/emergencies/diseases/novel-coronavirus-2019/question-and-answers-hub/q-a-detail/q-a-coronaviruses>) (2020) [Online; accessed 28-May-2020].
26. Centers for Disease Control and Prevention, How COVID-19 Spreads (<https://www.cdc.gov/coronavirus/2019-ncov/prevent-getting-sick/how-covid-spreads.html>) (2020) [Online; accessed 28-May-2020].
27. A Stopczynski, AS Pentland, S Lehmann, Physical proximity and spreading in dynamic social networks. *arXiv preprint arXiv:1509.06530* (2015).
28. Our World In Data, European Centre for Disease Prevention and Control, covid-19-data (Deaths) (<https://github.com/owid/covid-19-data/>) (2020).
29. MGM Gomes, et al., Individual variation in susceptibility or exposure to sars-cov-2 lowers the herd immunity threshold. *medRxiv* (2020).
30. Y Zhang, Y Li, L Wang, M Li, X Zhou, Evaluating transmission heterogeneity and super-spreading event of covid-19 in a metropolis of china. *Int. J. Environ. Res. Public Heal.* **17**, 3705 (2020).
31. BM Althouse, et al., Stochasticity and heterogeneity in the transmission dynamics of sars-cov-2 (2020).
32. K Sneppen, L Simonsen, Impact of superspreaders on dissemination and mitigation of covid-19. *medRxiv* (2020).
